# Supplementary material for: Analysis of 182 cerebral palsy transcriptomes points to dysregulation of trophic signalling pathways and overlap with autism
Source: PubMed Central journal article supplement (PMC5911435; doi:10.1038/s41398-018-0136-4), 2018-04-23
Supplement: 41398_2018_136_MOESM1_ESM.pdf [file 41398_2018_136_MOESM1_ESM.pdf]

## **Supplementary data**

### **Analysis of 182 cerebral palsy transcriptomes points to dysregulation of trophic signalling pathways and overlap with autism**

Clare L. van Eyk,<sup>1,2</sup> Mark A. Corbett,<sup>1,2</sup> Alison Gardner,<sup>1,2</sup> Bregje W. van Bon,<sup>4</sup> Jessica L. Broadbent,<sup>1</sup> Kelly Harper,<sup>1</sup> Alastair H. MacLennan,<sup>1</sup> Jozef Gecz\*<sup>1,2,3</sup>

<sup>1</sup> Robinson Research Institute, Faculty of Health and Medical Sciences, University of Adelaide, Adelaide, S.A., Australia

<sup>2</sup> Adelaide Medical School, Faculty of Health and Medical Sciences, University of Adelaide, Adelaide, S.A., Australia

<sup>3</sup> South Australian Health and Medical Research Institute, Adelaide, S.A., Australia

<sup>4</sup> Department of Human Genetics, Radboud University Medical Center, Nijmegen, the Netherlands

\*Correspondence: Professor Jozef Gecz, Adelaide Medical School, Faculty of Health and Medical Sciences, University of Adelaide, Level 8, Adelaide Health and Medical Sciences Building, Corner North Terrace and George Street., Adelaide, S.A., Australia, 5005. Phone: +61 08 8313 2453, Email: [jozef.gecz@adelaide.edu.au](mailto:jozef.gecz@adelaide.edu.au)

| <b>Cell line</b> | <b>Proband ID</b> | <b>Sample type</b> | <b>Age at collection</b> | <b>Sex</b> | <b>RIN</b> |
|------------------|-------------------|--------------------|--------------------------|------------|------------|
| 4272             | P001              | Case               | 6                        | F          | 9.8        |
| 4273             | P002              | Case               | 5                        | F          | 9.7        |
| 4274             | P003              | Case               | 6                        | F          | 9.6        |
| 4275             | P004              | Case               | 5                        | F          | 9.4        |
| 4276             | P005              | Case               | 10                       | F          | 9.6        |
| 4292             | P007              | Case               | 16                       | F          | 9.6        |
| 4293             | P008              | Case               | 13                       | M          | 9.5        |
| 4305             | P010              | Case               | 8                        | M          | 9.8        |
| 4306             | P011              | Case               | 3                        | F          | 9.7        |
| 4307             | P012              | Case               | 3                        | F          | 9.6        |
| 4308             | P013              | Case               | 5                        | F          | 9.6        |
| 4309             | P014              | Case               | 7                        | M          | 9.6        |
| 4310             | P015              | Case               | 10                       | M          | 9.3        |
| 4311             | P016              | Case               | 15                       | M          | 9.2        |
| 4344             | P009              | Case               | 8                        | M          | 9.4        |
| 4345             | P017              | Case               | 6                        | M          | 9.3        |
| 4346             | P018              | Case               | 8                        | F          | 9.2        |
| 4347             | P019              | Case               | 12                       | M          | 9.4        |
| 4348             | P020              | Case               | 16                       | F          | 9.3        |
| 4349             | P021              | Case               | 4                        | M          | 9.3        |
| 4350             | P022              | Case               | 2                        | M          | 9.5        |
| 4437             | P023              | Case               | 5                        | F          | 9.2        |
| 4438             | P024              | Case               | 15                       | F          | 9.3        |
| 4569             | P026              | Case               | 15                       | F          | 9.2        |
| 4570             | P027              | Case               | 14                       | M          | 9.1        |
| 4577             | P028              | Case               | 16                       | F          | 9.3        |
| 4590             | P029              | Case               | 11                       | M          | 9.4        |
| 4591             | P030              | Case               | 18                       | M          | 9.6        |
| 4630             | P031              | Case               | 2                        | M          | 9.4        |
| 4631             | P032              | Case               | 4                        | M          | 9.5        |
| 4632             | P033              | Case               | 6                        | M          | 9.4        |
| 4633             | P034              | Case               | 10                       | M          | 9.6        |
| 4646             | P035              | Case               | 12                       | F          | 9.3        |
| 4648             | P036              | Case               | 8                        | F          | 9.5        |
| 4651             | P037              | Case               | 23                       | F          | 9.4        |
| 4681             | P038              | Case               | 32                       | M          | 9.4        |
| 4683             | P025              | Case               | 6                        | M          | 9.3        |
| 4684             | P039              | Case               | 8                        | M          | 9.3        |
| 4726             | P040              | Case               | 13                       | M          | 9.3        |
| 4727             | P041              | Case               | 20                       | F          | 9.3        |
| 4740             | P042              | Case               | 24                       | F          | 9.1        |
| 4744             | P043              | Case               | 12                       | F          | 9.1        |

|      |      |      |    |   |     |
|------|------|------|----|---|-----|
| 4745 | P044 | Case | 2  | F | 9   |
| 4746 | P045 | Case | 6  | F | 9.2 |
| 4747 | P046 | Case | 2  | F | 9.2 |
| 4748 | P047 | Case | 10 | M | 9.3 |
| 4793 | P049 | Case | 8  | M | 9.3 |
| 4895 | P050 | Case | 4  | M | 9.4 |
| 4979 | P051 | Case | 10 | M | 9.5 |
| 4984 | P052 | Case | 15 | F | 9.5 |
| 5113 | P053 | Case | 9  | M | 9.6 |
| 5114 | P054 | Case | 6  | M | 9.6 |
| 5115 | P055 | Case | 6  | F | 9.5 |
| 5116 | P056 | Case | 10 | M | 9.5 |
| 5117 | P057 | Case | 10 | M | 9.4 |
| 5118 | P058 | Case | 3  | M | 9.5 |
| 5158 | P059 | Case | 15 | M | 9.6 |
| 5239 | P060 | Case | 3  | F | 9.6 |
| 5240 | P061 | Case | 3  | M | 9.5 |
| 5241 | P062 | Case | 5  | F | 9.4 |
| 5242 | P063 | Case | 6  | F | 9.6 |
| 5243 | P064 | Case | 6  | M | 9.5 |
| 5296 | P065 | Case | 12 | F | 9.5 |
| 5382 | P066 | Case | 20 | M | 9.5 |
| 5461 | P067 | Case | 2  | F | 9.4 |
| 5494 | P068 | Case | 6  | M | 9.5 |
| 5521 | P069 | Case | 5  | F | 9.5 |
| 5522 | P070 | Case | 5  | M | 9.4 |
| 5523 | P071 | Case | 9  | M | 9.4 |
| 5524 | P072 | Case | 10 | M | 9.3 |
| 5546 | P073 | Case | 13 | M | 9.4 |
| 5577 | P074 | Case | 8  | F | 9.3 |
| 6085 | P075 | Case | 3  | F | 9.3 |
| 6086 | P076 | Case | 6  | F | 8.9 |
| 6087 | P077 | Case | 8  | F | 9   |
| 6123 | P078 | Case | 2  | M | 9   |
| 6124 | P079 | Case | 4  | M | 9.2 |
| 6125 | P080 | Case | 18 | M | 9.1 |
| 6138 | P081 | Case | 2  | F | 9.3 |
| 6139 | P082 | Case | 3  | F | 9.4 |
| 6140 | P083 | Case | 4  | M | 9.1 |
| 6141 | P084 | Case | 11 | F | 9   |
| 6293 | P096 | Case | 1  | M | 9.4 |
| 6294 | P097 | Case | 2  | M | 9.5 |
| 6295 | P098 | Case | 2  | F | 9.5 |
| 6296 | P099 | Case | 9  | M | 9.4 |

|      |      |      |    |   |     |
|------|------|------|----|---|-----|
| 6477 | P101 | Case | 13 | M | 9.6 |
| 6478 | P102 | Case | 17 | M | 9.4 |
| 6479 | P103 | Case | 18 | M | 9.4 |
| 6480 | P100 | Case | 6  | F | 9.5 |
| 6493 | P104 | Case | 2  | M | 9.4 |
| 6494 | P105 | Case | 2  | F | 9   |
| 6495 | P106 | Case | 4  | M | 9.8 |
| 6496 | P107 | Case | 4  | F | 9.6 |
| 6497 | P108 | Case | 11 | M | 9.7 |
| 6652 | P401 | Case | 6  | F | 9.7 |
| 6653 | P402 | Case | 6  | F | 9.6 |
| 6654 | P403 | Case | 7  | M | 9.6 |
| 6655 | P404 | Case | 7  | F | 9.7 |
| 6656 | P405 | Case | 8  | M | 9.7 |
| 6673 | P406 | Case | 15 | F | 9.6 |
| 6674 | P407 | Case | 4  | M | 9.6 |
| 6675 | P408 | Case | 5  | M | 9.6 |
| 6676 | P409 | Case | 7  | M | 9.5 |
| 6677 | P410 | Case | 8  | F | 9.7 |
| 6680 | P411 | Case | 13 | F | 9.7 |
| 6682 | P109 | Case | 9  | M | 9.7 |
| 6683 | P110 | Case | 3  | M | 9.6 |
| 6684 | P111 | Case | 2  | M | 9.7 |
| 6685 | P412 | Case | 18 | M | 9.7 |
| 6700 | P413 | Case | 3  | M | 9.5 |
| 6701 | P414 | Case | 10 | M | 9.6 |
| 6702 | P415 | Case | 12 | F | 9.7 |
| 6703 | P416 | Case | 12 | M | 9.7 |
| 6717 | P417 | Case | 4  | M | 8.9 |
| 6718 | P418 | Case | 6  | F | 9.3 |
| 6719 | P419 | Case | 9  | F | 8.9 |
| 6720 | P420 | Case | 10 | M | 9.5 |
| 6749 | P422 | Case | 6  | F | 9.2 |
| 6829 | P112 | Case | 9  | F | 9.2 |
| 6868 | P423 | Case | 3  | F | 9.4 |
| 6869 | P424 | Case | 4  | M | 9.4 |
| 6870 | P425 | Case | 11 | M | 9.3 |
| 6927 | P426 | Case | 4  | F | 9.4 |
| 6928 | P427 | Case | 6  | M | 9.3 |
| 6929 | P428 | Case | 9  | M | 9.4 |
| 6977 | P429 | Case | 8  | M | 9.3 |
| 6978 | P430 | Case | 12 | F | 9.3 |
| 6988 | P431 | Case | 12 | F | 9.7 |
| 7016 | P432 | Case | 8  | F | 9.6 |

|      |      |      |    |   |     |
|------|------|------|----|---|-----|
| 7017 | P433 | Case | 5  | F | 9.6 |
| 7018 | P434 | Case | 9  | F | 9.6 |
| 7028 | P435 | Case | 11 | M | 9.6 |
| 7055 | P436 | Case | 4  | F | 9.5 |
| 7056 | P437 | Case | 9  | M | 9.3 |
| 7057 | P438 | Case | 12 | M | 9.6 |
| 7058 | P439 | Case | 14 | M | 9.5 |
| 7075 | P113 | Case | 7  | M | 9.5 |
| 7132 | P440 | Case | 6  | M | 9.5 |
| 7133 | P441 | Case | 8  | M | 9.5 |
| 7134 | P442 | Case | 8  | M | 9.4 |
| 7135 | P443 | Case | 9  | F | 9.3 |
| 7198 | P444 | Case | 6  | F | 9.2 |
| 7199 | P445 | Case | 9  | M | 9.4 |
| 7200 | P446 | Case | 4  | F | 9.3 |
| 7209 | P447 | Case | 11 | M | 9.4 |
| 7210 | P448 | Case | 12 | M | 9.4 |
| 7211 | P449 | Case | 16 | F | 9.3 |
| 7268 | P450 | Case | 5  | M | 9.5 |
| 7269 | P451 | Case | 8  | F | 9.2 |
| 7270 | P452 | Case | 13 | M | 9.4 |
| 7315 | P114 | Case | 2  | F | 9.3 |
| 7322 | P453 | Case | 3  | F | 9.7 |
| 7323 | P454 | Case | 3  | M | 9.8 |
| 7370 | P455 | Case | 5  | M | 9.8 |
| 7371 | P456 | Case | 4  | M | 9.8 |
| 7372 | P457 | Case | 14 | M | 9.8 |
| 7385 | P458 | Case | 5  | F | 9.7 |
| 7386 | P459 | Case | 4  | F | 9.7 |
| 7387 | P460 | Case | 14 | M | 9.7 |
| 7388 | P461 | Case | 8  | M | 9.7 |
| 7420 | P462 | Case | 10 | F | 9.6 |
| 7421 | P463 | Case | 11 | F | 9.6 |
| 7492 | P421 | Case | 13 | F | 9.8 |
| 7495 | P464 | Case | 6  | M | 9.7 |
| 7501 | P465 | Case | 4  | F | 9.6 |
| 7502 | P466 | Case | 8  | M | 9.7 |
| 7509 | P115 | Case | 3  | M | 9.6 |
| 7510 | P116 | Case | 4  | F | 9.6 |
| 7511 | P117 | Case | 4  | M | 9.5 |
| 7526 | P467 | Case | 6  | F | 9.1 |
| 7527 | P468 | Case | 12 | F | 9.6 |
| 7528 | P469 | Case | 11 | F | 9.6 |
| 7646 | P470 | Case | 3  | M | 9.6 |

|      |       |         |    |   |     |
|------|-------|---------|----|---|-----|
| 7647 | P471  | Case    | 4  | F | 9.5 |
| 7648 | P472  | Case    | 13 | M | 9.6 |
| 7772 | P474  | Case    | 3  | M | 9.6 |
| 7773 | P475  | Case    | 5  | M | 9.6 |
| 7775 | P118  | Case    | 7  | M | 9.4 |
| 7939 | P476  | Case    | 6  | F | 9.5 |
| 7957 | P119  | Case    | 12 | F | 9.5 |
| 7997 | P477  | Case    | 7  | F | 9.5 |
| TW   | 94595 | Control | 42 | F | 9.6 |
| JD   | 83921 | Control | 49 | M | 9.7 |
| KQ   | 23397 | Control | 47 | M | 9.5 |
| VB   | 88981 | Control | 59 | M | 9.7 |
| AB   | 22121 | Control | 41 | M | 9.6 |
| MH   | 17097 | Control | 44 | F | 9.6 |
| LW   | 88804 | Control | 32 | F | 9.5 |
| ET   | 80795 | Control | 72 | M | 9.5 |
| TB   | 90653 | Control | 28 | F | 9.6 |
| JuL  | 90185 | Control | 69 | F | 9.6 |
| RA   | 91119 | Control | 40 | F | 9.5 |
| JoL  | 90185 | Control | 73 | M | 9.6 |
| MD   | 86598 | Control | 65 | F | 9.8 |
| JP   | 83606 | Control | 77 | F | 9.8 |
| AH   | 87509 | Control | 4  | M | 10  |
| PK   | 85983 | Control | 39 | M | 9.6 |
| JG   | 84986 | Control | 63 | F | 9.8 |
| RS   | 23398 | Control | 27 | M | 9.5 |
| BH   | 84116 | Control | 45 | M | 9.5 |
| KW   | 95824 | Control | 37 | F | 9.6 |

**Table S2: RNA samples sequenced in this study.** RIN, RNA integrity number; F, female; M, male.

| Sample ID | Population | Sex |
|-----------|------------|-----|
| HG00096   | GBR        | M   |
| HG00099   | GBR        | F   |
| HG00102   | GBR        | F   |
| HG00105   | GBR        | M   |
| HG00108   | GBR        | M   |
| HG00110   | GBR        | F   |
| HG00111   | GBR        | F   |
| HG00114   | GBR        | M   |
| HG00119   | GBR        | M   |
| HG00120   | GBR        | F   |
| HG00121   | GBR        | F   |
| HG00122   | GBR        | F   |
| HG00123   | GBR        | F   |
| HG00124   | GBR        | F   |
| HG00125   | GBR        | F   |
| HG00126   | GBR        | M   |
| HG00127   | GBR        | F   |
| HG00128   | GBR        | F   |
| HG00129   | GBR        | M   |
| HG00130   | GBR        | F   |
| HG00131   | GBR        | M   |
| HG00133   | GBR        | F   |
| HG00135   | GBR        | F   |
| HG00136   | GBR        | M   |
| HG00137   | GBR        | F   |
| HG00138   | GBR        | M   |
| HG00142   | GBR        | M   |
| HG00148   | GBR        | M   |
| HG00150   | GBR        | F   |
| HG00151   | GBR        | M   |
| HG00155   | GBR        | M   |
| HG00156   | GBR        | M   |
| HG00160   | GBR        | M   |
| HG00171   | FIN        | F   |
| HG00173   | FIN        | F   |
| HG00176   | FIN        | F   |
| HG00179   | FIN        | F   |
| HG00181   | FIN        | M   |
| HG00186   | FIN        | M   |
| HG00189   | FIN        | M   |
| HG00232   | GBR        | F   |
| HG00235   | GBR        | F   |
| HG00242   | GBR        | M   |
| HG00243   | GBR        | M   |
| HG00247   | GBR        | F   |
| HG00249   | GBR        | F   |
| HG00250   | GBR        | F   |

| Sample ID | Population | Sex |
|-----------|------------|-----|
| HG00252   | GBR        | M   |
| HG00261   | GBR        | F   |
| HG00262   | GBR        | F   |
| HG00263   | GBR        | F   |
| HG00274   | FIN        | F   |
| HG00276   | FIN        | F   |
| HG00278   | FIN        | M   |
| HG00319   | FIN        | F   |
| HG00323   | FIN        | F   |
| HG00329   | FIN        | M   |
| HG00350   | FIN        | F   |
| HG00351   | FIN        | M   |
| HG01790   | GBR        | F   |
| NA06984   | CEU        | M   |
| NA06989   | CEU        | F   |
| NA07048   | CEU        | M   |
| NA10851   | CEU        | M   |
| NA11829   | CEU        | M   |
| NA11830   | CEU        | F   |
| NA11992   | CEU        | M   |
| NA12342   | CEU        | M   |
| NA12348   | CEU        | F   |
| NA12399   | CEU        | M   |
| NA12400   | CEU        | F   |
| NA12546   | CEU        | M   |
| NA12749   | CEU        | F   |
| NA12760   | CEU        | M   |
| NA12762   | CEU        | M   |
| NA12777   | CEU        | M   |
| NA12812   | CEU        | M   |
| NA12827   | CEU        | M   |
| NA12830   | CEU        | F   |
| NA12843   | CEU        | F   |
| NA12874   | CEU        | M   |
| NA12890   | CEU        | F   |
| NA18487   | YRI        | M   |
| NA18517   | YRI        | F   |
| NA18861   | YRI        | M   |
| NA19119   | YRI        | M   |
| NA20502   | TSI        | F   |
| NA20504   | TSI        | F   |
| NA20506   | TSI        | F   |
| NA20510   | TSI        | M   |
| NA20520   | TSI        | M   |
| NA20542   | TSI        | F   |
| NA20787   | TSI        | M   |
| NA20805   | TSI        | M   |

**Table S3: Samples from the gEUVADIS data set used in this study.** Sample IDs refer to the individual as listed in the 1000 genomes project database <http://www.1000genomes.org/>. F, female; M, male.



| Gene Symbol     | Log Fold Change | Average Log Expression | Adjusted p value |
|-----------------|-----------------|------------------------|------------------|
| <i>MIR650</i>   | 3.38            | 5.40                   | 7.18E-12         |
| <i>KLHL14</i>   | 2.65            | 3.13                   | 7.95E-31         |
| <i>AEBP1</i>    | 2.07            | 3.51                   | 2.66E-26         |
| <i>RASGRP2</i>  | 1.97            | 3.77                   | 4.19E-50         |
| <i>RBMS1</i>    | 1.93            | 3.07                   | 1.93E-34         |
| <i>PXDN</i>     | 1.91            | 4.06                   | 1.01E-16         |
| <i>PLD4</i>     | 1.90            | 3.80                   | 7.90E-34         |
| <i>CD24</i>     | 1.89            | 4.85                   | 1.30E-28         |
| <i>FAM46C</i>   | 1.75            | 6.06                   | 1.49E-27         |
| <i>ZFY</i>      | 1.72            | 3.59                   | 9.75E-09         |
| <i>IGJ</i>      | 1.71            | 10.63                  | 2.43E-19         |
| <i>ARL4C</i>    | 1.69            | 4.77                   | 1.40E-24         |
| <i>LOC96610</i> | 1.68            | 7.10                   | 1.83E-20         |
| <i>MTSS1</i>    | 1.65            | 3.42                   | 2.80E-27         |
| <i>RSAD2</i>    | 1.58            | 4.83                   | 1.67E-31         |
| <i>DDX60L</i>   | 1.58            | 5.11                   | 3.44E-30         |
| <i>IGLL5</i>    | 1.57            | 10.11                  | 3.30E-14         |
| <i>DDX3Y</i>    | 1.54            | 6.94                   | 3.92E-11         |
| <i>VPREB3</i>   | 1.53            | 3.02                   | 5.87E-14         |
| <i>ZAP70</i>    | 1.53            | 2.48                   | 2.42E-14         |
| <i>KLF2</i>     | 1.53            | 4.42                   | 1.99E-32         |
| <i>USP9Y</i>    | 1.51            | 5.34                   | 1.92E-12         |
| <i>ZBP1</i>     | 1.50            | 5.04                   | 4.59E-37         |
| <i>PDE3B</i>    | 1.40            | 3.18                   | 5.40E-11         |
| <i>RALGPS2</i>  | 1.37            | 6.19                   | 9.82E-35         |
| <i>CD180</i>    | 1.36            | 5.99                   | 1.68E-32         |
| <i>UTY</i>      | 1.36            | 5.00                   | 3.63E-11         |
| <i>CD28</i>     | 1.35            | 4.63                   | 2.49E-12         |
| <i>SELIL3</i>   | 1.31            | 7.81                   | 4.56E-26         |
| <i>TXNIP</i>    | 1.28            | 7.31                   | 3.82E-21         |
| <i>CMPK2</i>    | 1.27            | 5.59                   | 5.10E-28         |
| <i>TXLNG2P</i>  | 1.23            | 5.50                   | 1.94E-10         |
| <i>CECR1</i>    | 1.23            | 6.85                   | 9.34E-33         |
| <i>IFIT1</i>    | 1.23            | 6.78                   | 2.69E-21         |
| <i>JHDM1D</i>   | 1.22            | 3.39                   | 1.65E-26         |
| <i>NEFH</i>     | 1.22            | 3.57                   | 1.53E-17         |
| <i>C17orf28</i> | 1.21            | 2.99                   | 5.05E-19         |
| <i>FOXP1</i>    | 1.21            | 3.11                   | 1.42E-11         |
| <i>CD38</i>     | 1.20            | 6.05                   | 5.41E-20         |
| <i>LPAR6</i>    | 1.20            | 5.31                   | 2.28E-14         |
| <i>LGALS3BP</i> | 1.19            | 5.04                   | 4.08E-14         |
| <i>FER1L4</i>   | 1.16            | 3.30                   | 3.80E-25         |
| <i>C8orf80</i>  | 1.16            | 4.43                   | 2.27E-21         |
| <i>CD96</i>     | 1.16            | 4.13                   | 4.86E-08         |

| Gene Symbol      | Log Fold Change | Average Log Expression | Adjusted p value |
|------------------|-----------------|------------------------|------------------|
| <i>HIP1R</i>     | 1.14            | 5.26                   | 3.10E-27         |
| <i>PLAC8</i>     | 1.11            | 7.74                   | 8.93E-19         |
| <i>ARRDC3</i>    | 1.09            | 5.14                   | 1.81E-17         |
| <i>KCNA3</i>     | 1.09            | 3.84                   | 3.93E-20         |
| <i>CPM</i>       | 1.09            | 3.87                   | 2.37E-19         |
| <i>FCRL4</i>     | 1.06            | 2.80                   | 1.03E-07         |
| <i>LTB</i>       | 1.05            | 5.52                   | 9.33E-19         |
| <i>MPEG1</i>     | 1.05            | 5.69                   | 6.54E-20         |
| <i>CPNE5</i>     | 1.04            | 6.11                   | 9.25E-23         |
| <i>FCRL5</i>     | 1.04            | 7.93                   | 1.33E-22         |
| <i>IFI27</i>     | 1.04            | 2.84                   | 3.45E-06         |
| <i>BCL11A</i>    | 1.03            | 4.76                   | 4.65E-23         |
| <i>CD72</i>      | 1.02            | 4.51                   | 6.52E-27         |
| <i>ISG15</i>     | 1.02            | 8.38                   | 1.82E-22         |
| <i>BIK</i>       | 1.01            | 3.22                   | 1.14E-13         |
| <i>NEIL1</i>     | 1.01            | 3.86                   | 5.21E-20         |
| <i>CCR1</i>      | 1.00            | 4.16                   | 5.49E-12         |
| <i>IGFBP4</i>    | -1.00           | 3.33                   | 3.65E-07         |
| <i>CD80</i>      | -1.01           | 5.93                   | 2.66E-28         |
| <i>DAPK1</i>     | -1.01           | 6.09                   | 3.47E-17         |
| <i>PVRL1</i>     | -1.02           | 4.26                   | 3.60E-15         |
| <i>RPS4Y1</i>    | -1.02           | 6.56                   | 0.000271         |
| <i>ADCY6</i>     | -1.02           | 3.62                   | 1.59E-14         |
| <i>SPATS2L</i>   | -1.03           | 5.13                   | 3.87E-14         |
| <i>BHLHE40</i>   | -1.03           | 7.23                   | 5.21E-14         |
| <i>ACTA2</i>     | -1.04           | 4.50                   | 1.65E-15         |
| <i>FSCN1</i>     | -1.04           | 8.09                   | 2.44E-17         |
| <i>ABCB4</i>     | -1.04           | 3.33                   | 3.98E-24         |
| <i>CACNB4</i>    | -1.04           | 3.85                   | 2.60E-06         |
| <i>CLIC2</i>     | -1.04           | 3.38                   | 1.18E-11         |
| <i>DENND3</i>    | -1.05           | 6.26                   | 3.05E-25         |
| <i>PCGF2</i>     | -1.06           | 3.10                   | 3.18E-11         |
| <i>PPFIBP1</i>   | -1.06           | 5.13                   | 3.19E-21         |
| <i>KIAA1324L</i> | -1.06           | 3.29                   | 1.07E-12         |
| <i>CDKN1A</i>    | -1.06           | 8.11                   | 1.15E-38         |
| <i>PTAFR</i>     | -1.06           | 5.40                   | 5.20E-08         |
| <i>CTH</i>       | -1.07           | 4.24                   | 2.37E-10         |
| <i>NIDI</i>      | -1.08           | 5.06                   | 4.34E-11         |
| <i>BAZ2B</i>     | -1.08           | 4.74                   | 2.00E-32         |
| <i>ARHGAP10</i>  | -1.08           | 4.95                   | 2.64E-34         |
| <i>EBI3</i>      | -1.09           | 6.76                   | 4.27E-17         |
| <i>CPNE8</i>     | -1.09           | 4.55                   | 4.96E-32         |
| <i>ANK1</i>      | -1.10           | 4.08                   | 4.62E-11         |
| <i>INPP5F</i>    | -1.10           | 2.81                   | 1.76E-11         |

|                 |       |      |          |
|-----------------|-------|------|----------|
| <i>PLAG1</i>    | -1.11 | 2.81 | 1.32E-17 |
| <i>LAG3</i>     | -1.12 | 3.86 | 2.26E-09 |
| <i>RNF207</i>   | -1.12 | 3.32 | 7.38E-27 |
| <i>CNTNAP1</i>  | -1.12 | 6.01 | 7.38E-27 |
| <i>AMOTL1</i>   | -1.13 | 3.33 | 1.18E-08 |
| <i>CCDC74A</i>  | -1.13 | 3.08 | 4.65E-05 |
| <i>CDC42BPA</i> | -1.14 | 4.65 | 4.54E-06 |
| <i>GPR15</i>    | -1.15 | 6.56 | 1.43E-39 |
| <i>RGS2</i>     | -1.15 | 3.07 | 7.81E-08 |
| <i>PAPLN</i>    | -1.16 | 4.00 | 1.38E-21 |
| <i>IL2RA</i>    | -1.16 | 3.24 | 1.08E-08 |
| <i>TMEM132A</i> | -1.16 | 2.81 | 2.25E-16 |
| <i>IL4I1</i>    | -1.17 | 6.48 | 4.25E-08 |
| <i>TNFRSF8</i>  | -1.17 | 6.57 | 5.37E-33 |
| <i>CCL22</i>    | -1.17 | 8.96 | 2.09E-10 |
| <i>TEX9</i>     | -1.18 | 4.05 | 8.95E-20 |
| <i>MB21D2</i>   | -1.18 | 3.86 | 6.06E-07 |
| <i>IL12RB2</i>  | -1.19 | 2.94 | 6.14E-10 |
| <i>TMTC2</i>    | -1.19 | 2.93 | 9.05E-25 |
| <i>TNIK</i>     | -1.20 | 6.62 | 4.49E-18 |
| <i>TNFAIP2</i>  | -1.21 | 5.51 | 4.50E-18 |
| <i>TBX15</i>    | -1.24 | 3.13 | 1.99E-06 |
| <i>SLC12A8</i>  | -1.24 | 5.63 | 1.51E-16 |
| <i>PCNXL2</i>   | -1.24 | 2.91 | 2.27E-26 |
| <i>PRKCH</i>    | -1.25 | 3.89 | 2.18E-07 |
| <i>PRRT3</i>    | -1.25 | 3.96 | 1.80E-38 |
| <i>AUTS2</i>    | -1.26 | 4.38 | 1.61E-12 |
| <i>EIF1AY</i>   | -1.26 | 4.63 | 0.005482 |
| <i>LRRK2</i>    | -1.27 | 5.34 | 1.08E-10 |
| <i>RASSF4</i>   | -1.29 | 4.81 | 1.33E-29 |
| <i>NACC2</i>    | -1.29 | 3.34 | 2.07E-18 |
| <i>PARM1</i>    | -1.30 | 5.00 | 1.61E-10 |
| <i>GIMAP6</i>   | -1.32 | 4.95 | 2.79E-18 |
| <i>CBS</i>      | -1.33 | 2.70 | 6.56E-12 |
| <i>PHLDA3</i>   | -1.33 | 4.07 | 1.40E-19 |
| <i>CSF1</i>     | -1.39 | 4.82 | 1.72E-25 |
| <i>GBP4</i>     | -1.40 | 4.80 | 2.39E-12 |
| <i>RAB38</i>    | -1.41 | 3.31 | 6.11E-15 |
| <i>RGS16</i>    | -1.41 | 5.62 | 7.48E-43 |
| <i>ITGB8</i>    | -1.41 | 4.21 | 3.01E-17 |
| <i>NCALD</i>    | -1.41 | 4.64 | 1.08E-20 |
| <i>SOCS3</i>    | -1.43 | 3.44 | 7.43E-11 |
| <i>ATF5</i>     | -1.46 | 6.94 | 4.32E-12 |
| <i>HDGFRP3</i>  | -1.47 | 4.35 | 1.02E-20 |
| <i>DNAH17</i>   | -1.50 | 3.43 | 2.03E-14 |

|                  |       |      |          |
|------------------|-------|------|----------|
| <i>EDA2R</i>     | -1.50 | 4.21 | 3.06E-48 |
| <i>KIAA2022</i>  | -1.51 | 2.83 | 2.23E-20 |
| <i>STARD13</i>   | -1.52 | 4.44 | 1.50E-35 |
| <i>LIPH</i>      | -1.54 | 3.21 | 5.89E-24 |
| <i>HAAO</i>      | -1.55 | 3.74 | 2.04E-42 |
| <i>SV2A</i>      | -1.59 | 2.86 | 4.34E-25 |
| <i>NTRK2</i>     | -1.59 | 3.43 | 6.88E-26 |
| <i>ROBO1</i>     | -1.64 | 4.14 | 2.95E-13 |
| <i>GPR55</i>     | -1.65 | 4.61 | 2.59E-25 |
| <i>FAM169A</i>   | -1.69 | 2.92 | 3.18E-21 |
| <i>TOX</i>       | -1.69 | 3.20 | 7.59E-15 |
| <i>TNFSF4</i>    | -1.72 | 3.89 | 5.21E-20 |
| <i>HCK</i>       | -1.72 | 3.68 | 2.58E-09 |
| <i>ANO10</i>     | -1.72 | 3.19 | 7.43E-30 |
| <i>BAIAP2L1</i>  | -1.73 | 3.55 | 3.53E-14 |
| <i>ZNF697</i>    | -1.76 | 2.78 | 1.14E-33 |
| <i>TMOD1</i>     | -1.81 | 3.67 | 1.71E-22 |
| <i>MOXD1</i>     | -1.83 | 3.39 | 6.92E-15 |
| <i>UNC13B</i>    | -1.84 | 2.90 | 1.05E-15 |
| <i>IL18R1</i>    | -1.84 | 4.07 | 9.08E-23 |
| <i>TSPAN12</i>   | -1.86 | 3.51 | 2.53E-31 |
| <i>RIMS3</i>     | -1.88 | 2.66 | 9.05E-25 |
| <i>ADAM22</i>    | -1.90 | 3.96 | 2.62E-60 |
| <i>HECW2</i>     | -1.96 | 3.33 | 2.85E-20 |
| <i>PARD3</i>     | -1.96 | 4.13 | 4.93E-21 |
| <i>UCHL1</i>     | -1.96 | 4.23 | 2.49E-15 |
| <i>ACTN1</i>     | -1.99 | 4.23 | 3.78E-21 |
| <i>GSTM1</i>     | -1.99 | 2.85 | 1.10E-07 |
| <i>LOXL3</i>     | -2.00 | 3.29 | 9.19E-35 |
| <i>SMAD1</i>     | -2.03 | 3.41 | 1.71E-27 |
| <i>ARHGAP6</i>   | -2.18 | 3.02 | 2.25E-25 |
| <i>CACNA1E</i>   | -2.25 | 4.08 | 5.64E-28 |
| <i>FGFR1</i>     | -2.30 | 4.05 | 2.92E-29 |
| <i>ARHGEF17</i>  | -2.32 | 3.54 | 9.23E-33 |
| <i>CYP11B1</i>   | -2.37 | 4.50 | 5.72E-29 |
| <i>APBB2</i>     | -2.46 | 2.85 | 2.10E-25 |
| <i>TNFRSF19</i>  | -2.49 | 3.53 | 3.94E-17 |
| <i>CNR1</i>      | -2.59 | 3.17 | 3.70E-27 |
| <i>LOC728175</i> | -2.61 | 3.52 | 5.16E-30 |
| <i>LAMP5</i>     | -2.65 | 4.15 | 8.22E-14 |
| <i>EVC</i>       | -2.75 | 3.21 | 5.71E-29 |
| <i>DST</i>       | -3.04 | 6.75 | 6.90E-54 |
| <i>FBN1</i>      | -3.07 | 4.14 | 4.81E-63 |
| <i>KIF21A</i>    | -3.12 | 4.11 | 4.03E-47 |

**Table S4:** Genes differentially expressed between Cerebral Palsy cases and controls. Differential expression analysis performed on batch normalised data (ComBat) using the EdgeR package from Bioconductor.

| Gene Symbol     | Log Fold Change | Average Log Expression | Adjusted P value |
|-----------------|-----------------|------------------------|------------------|
| <i>MIR650</i>   | 3.38            | 5.40                   | 7.18E-12         |
| <i>KLHL14</i>   | 2.65            | 3.13                   | 7.95E-31         |
| <i>AEBP1</i>    | 2.07            | 3.51                   | 2.66E-26         |
| <i>RASGRP2</i>  | 1.97            | 3.77                   | 4.19E-50         |
| <i>RBMS1</i>    | 1.93            | 3.07                   | 1.93E-34         |
| <i>PLD4</i>     | 1.90            | 3.80                   | 7.90E-34         |
| <i>CD24</i>     | 1.89            | 4.85                   | 1.30E-28         |
| <i>FAM46C</i>   | 1.75            | 6.06                   | 1.49E-27         |
| <i>ZFY</i>      | 1.72            | 3.59                   | 9.75E-09         |
| <i>IGJ</i>      | 1.71            | 10.63                  | 2.43E-19         |
| <i>ARL4C</i>    | 1.69            | 4.77                   | 1.40E-24         |
| <i>LOC96610</i> | 1.68            | 7.10                   | 1.83E-20         |
| <i>MTSS1</i>    | 1.65            | 3.42                   | 2.80E-27         |
| <i>RSAD2</i>    | 1.58            | 4.83                   | 1.67E-31         |
| <i>DDX60L</i>   | 1.58            | 5.11                   | 3.44E-30         |
| <i>IGLL5</i>    | 1.57            | 10.11                  | 3.30E-14         |
| <i>KLF2</i>     | 1.53            | 4.42                   | 1.99E-32         |
| <i>ZBP1</i>     | 1.50            | 5.04                   | 4.59E-37         |
| <i>PDE3B</i>    | 1.39            | 3.18                   | 5.40E-11         |
| <i>RALGPS2</i>  | 1.37            | 6.19                   | 9.82E-35         |
| <i>CD180</i>    | 1.36            | 5.99                   | 1.68E-32         |
| <i>CD28</i>     | 1.35            | 4.63                   | 2.49E-12         |
| <i>SELIL3</i>   | 1.31            | 7.81                   | 4.56E-26         |
| <i>TXNIP</i>    | 1.28            | 7.31                   | 3.82E-21         |
| <i>CMPK2</i>    | 1.27            | 5.59                   | 5.10E-28         |
| <i>CECR1</i>    | 1.23            | 6.85                   | 9.34E-33         |
| <i>IFIT1</i>    | 1.23            | 6.78                   | 2.69E-21         |
| <i>JHDM1D</i>   | 1.22            | 3.39                   | 1.65E-26         |
| <i>C17orf28</i> | 1.21            | 2.99                   | 5.05E-19         |
| <i>FOXP1</i>    | 1.21            | 3.11                   | 1.42E-11         |
| <i>CD38</i>     | 1.20            | 6.05                   | 5.41E-20         |
| <i>LPAR6</i>    | 1.20            | 5.31                   | 2.28E-14         |
| <i>LGALS3BP</i> | 1.19            | 5.04                   | 4.08E-14         |
| <i>FER1L4</i>   | 1.16            | 3.30                   | 3.80E-25         |
| <i>C8orf80</i>  | 1.16            | 4.43                   | 2.27E-21         |
| <i>HIP1R</i>    | 1.14            | 5.26                   | 3.10E-27         |
| <i>PLAC8</i>    | 1.11            | 7.74                   | 8.93E-19         |
| <i>ARRDC3</i>   | 1.09            | 5.14                   | 1.81E-17         |
| <i>KCNA3</i>    | 1.09            | 3.84                   | 3.93E-20         |
| <i>CPM</i>      | 1.09            | 3.87                   | 2.37E-19         |
| <i>FCRL4</i>    | 1.06            | 2.80                   | 1.03E-07         |
| <i>LTB</i>      | 1.05            | 5.52                   | 9.33E-19         |
| <i>MPEG1</i>    | 1.05            | 5.69                   | 6.54E-20         |

| Gene Symbol     | Log Fold Change | Average Log Expression | Adjusted P value |
|-----------------|-----------------|------------------------|------------------|
| <i>CPNE5</i>    | 1.04            | 6.11                   | 9.25E-23         |
| <i>FCRL5</i>    | 1.04            | 7.93                   | 1.33E-22         |
| <i>IFI27</i>    | 1.04            | 2.84                   | 3.45E-06         |
| <i>BCL11A</i>   | 1.03            | 4.76                   | 4.65E-23         |
| <i>ISG15</i>    | 1.02            | 8.38                   | 1.82E-22         |
| <i>BIK</i>      | 1.01            | 3.22                   | 1.14E-13         |
| <i>PECAM1</i>   | 1.00            | 3.19                   | 4.01E-23         |
| <i>IGFBP4</i>   | -1.00           | 3.33                   | 3.65E-07         |
| <i>CD80</i>     | -1.01           | 5.93                   | 2.66E-28         |
| <i>DAPK1</i>    | -1.01           | 6.09                   | 3.47E-17         |
| <i>PVRL1</i>    | -1.02           | 4.26                   | 3.60E-15         |
| <i>ADCY6</i>    | -1.02           | 3.62                   | 1.59E-14         |
| <i>SPATS2L</i>  | -1.03           | 5.13                   | 3.87E-14         |
| <i>BHLHE40</i>  | -1.03           | 7.23                   | 5.21E-14         |
| <i>ACTA2</i>    | -1.04           | 4.50                   | 1.65E-15         |
| <i>FSCN1</i>    | -1.04           | 8.09                   | 2.44E-17         |
| <i>ABCB4</i>    | -1.04           | 3.33                   | 3.98E-24         |
| <i>CACNB4</i>   | -1.04           | 3.85                   | 2.60E-06         |
| <i>CLIC2</i>    | -1.04           | 3.38                   | 1.18E-11         |
| <i>DENND3</i>   | -1.05           | 6.26                   | 3.05E-25         |
| <i>PCGF2</i>    | -1.06           | 3.10                   | 3.18E-11         |
| <i>PPFIBP1</i>  | -1.06           | 5.13                   | 3.19E-21         |
| <i>CDKN1A</i>   | -1.06           | 8.11                   | 1.15E-38         |
| <i>PTAFR</i>    | -1.06           | 5.40                   | 5.20E-08         |
| <i>CTH</i>      | -1.07           | 4.24                   | 2.37E-10         |
| <i>NID1</i>     | -1.08           | 5.06                   | 4.34E-11         |
| <i>BAZ2B</i>    | -1.08           | 4.74                   | 2.00E-32         |
| <i>ARHGAP10</i> | -1.08           | 4.95                   | 2.64E-34         |
| <i>EBI3</i>     | -1.09           | 6.76                   | 4.27E-17         |
| <i>CPNE8</i>    | -1.09           | 4.55                   | 4.96E-32         |
| <i>ANK1</i>     | -1.10           | 4.08                   | 4.62E-11         |
| <i>INPP5F</i>   | -1.10           | 2.81                   | 1.76E-11         |
| <i>PLAG1</i>    | -1.11           | 2.81                   | 1.32E-17         |
| <i>LAG3</i>     | -1.12           | 3.86                   | 2.26E-09         |
| <i>RNF207</i>   | -1.12           | 3.32                   | 7.38E-27         |
| <i>CNTNAP1</i>  | -1.12           | 6.01                   | 7.38E-27         |
| <i>AMOTL1</i>   | -1.13           | 3.33                   | 1.18E-08         |
| <i>CDC42BPA</i> | -1.14           | 4.65                   | 4.54E-06         |
| <i>GPR15</i>    | -1.15           | 6.56                   | 1.43E-39         |
| <i>PAPLN</i>    | -1.16           | 4.00                   | 1.38E-21         |
| <i>IL2RA</i>    | -1.16           | 3.24                   | 1.08E-08         |
| <i>TMEM132A</i> | -1.16           | 8.06                   | 4.46E-08         |
| <i>IL4I1</i>    | -1.17           | 6.48                   | 4.25E-08         |

|                 |       |      |          |
|-----------------|-------|------|----------|
| <i>TNFRSF8</i>  | -1.17 | 6.57 | 5.37E-33 |
| <i>CCL22</i>    | -1.17 | 8.96 | 2.09E-10 |
| <i>TEX9</i>     | -1.18 | 4.05 | 8.95E-20 |
| <i>TNIK</i>     | -1.20 | 6.62 | 4.49E-18 |
| <i>TNFAIP2</i>  | -1.21 | 5.51 | 4.50E-18 |
| <i>TBX15</i>    | -1.24 | 3.13 | 1.99E-06 |
| <i>SLC12A8</i>  | -1.24 | 5.63 | 1.51E-16 |
| <i>PCNXL2</i>   | -1.24 | 2.91 | 2.27E-26 |
| <i>PRKCH</i>    | -1.25 | 3.89 | 2.18E-07 |
| <i>PRRT3</i>    | -1.25 | 3.96 | 1.80E-38 |
| <i>AUTS2</i>    | -1.26 | 4.38 | 1.61E-12 |
| <i>LRRK2</i>    | -1.27 | 5.34 | 1.08E-10 |
| <i>PARM1</i>    | -1.30 | 5.00 | 1.61E-10 |
| <i>GIMAP6</i>   | -1.32 | 4.95 | 2.79E-18 |
| <i>CBS</i>      | -1.33 | 2.70 | 6.56E-12 |
| <i>PHLDA3</i>   | -1.33 | 4.07 | 1.40E-19 |
| <i>CSF1</i>     | -1.39 | 4.82 | 1.72E-25 |
| <i>RAB38</i>    | -1.41 | 3.31 | 6.11E-15 |
| <i>RGS16</i>    | -1.41 | 5.62 | 7.48E-43 |
| <i>ITGB8</i>    | -1.41 | 4.21 | 3.01E-17 |
| <i>NCALD</i>    | -1.41 | 4.64 | 1.08E-20 |
| <i>SOCS3</i>    | -1.43 | 3.44 | 7.43E-11 |
| <i>DNAH17</i>   | -1.50 | 3.43 | 2.03E-14 |
| <i>EDA2R</i>    | -1.50 | 4.21 | 3.06E-48 |
| <i>KIAA2022</i> | -1.51 | 2.83 | 2.23E-20 |
| <i>STARD13</i>  | -1.52 | 4.44 | 1.50E-35 |
| <i>LIPH</i>     | -1.54 | 3.21 | 5.89E-24 |
| <i>HAAO</i>     | -1.55 | 3.74 | 2.04E-42 |
| <i>SV2A</i>     | -1.59 | 2.86 | 4.34E-25 |
| <i>NTRK2</i>    | -1.59 | 3.43 | 6.88E-26 |
| <i>ROBO1</i>    | -1.64 | 4.14 | 2.95E-13 |
| <i>GPR55</i>    | -1.65 | 4.61 | 2.59E-25 |
| <i>TOX</i>      | -1.69 | 3.20 | 7.59E-15 |

|                  |       |      |          |
|------------------|-------|------|----------|
| <i>TNFSF4</i>    | -1.72 | 3.89 | 5.21E-20 |
| <i>HCK</i>       | -1.72 | 3.68 | 2.58E-09 |
| <i>ANO10</i>     | -1.72 | 3.19 | 7.43E-30 |
| <i>BAIAP2L1</i>  | -1.73 | 3.55 | 3.53E-14 |
| <i>ZNF697</i>    | -1.76 | 2.78 | 1.14E-33 |
| <i>TMOD1</i>     | -1.81 | 3.67 | 1.71E-22 |
| <i>MOXD1</i>     | -1.83 | 3.39 | 6.92E-15 |
| <i>UNC13B</i>    | -1.84 | 2.90 | 1.05E-15 |
| <i>IL18R1</i>    | -1.84 | 4.07 | 9.08E-23 |
| <i>RIMS3</i>     | -1.88 | 2.66 | 9.05E-25 |
| <i>ADAM22</i>    | -1.90 | 3.96 | 2.62E-60 |
| <i>HECW2</i>     | -1.96 | 3.33 | 2.85E-20 |
| <i>PARD3</i>     | -1.96 | 4.13 | 4.93E-21 |
| <i>ACTN1</i>     | -1.99 | 4.23 | 3.78E-21 |
| <i>GSTM1</i>     | -1.99 | 2.85 | 1.10E-07 |
| <i>LOXL3</i>     | -2.00 | 3.29 | 9.19E-35 |
| <i>SMAD1</i>     | -2.03 | 3.41 | 1.71E-27 |
| <i>ARHGAP6</i>   | -2.18 | 3.02 | 2.25E-25 |
| <i>CACNA1E</i>   | -2.25 | 4.08 | 5.64E-28 |
| <i>FGFR1</i>     | -2.30 | 4.05 | 2.92E-29 |
| <i>ARHGEF17</i>  | -2.32 | 3.54 | 9.23E-33 |
| <i>CYP1B1</i>    | -2.37 | 4.50 | 5.72E-29 |
| <i>APBB2</i>     | -2.46 | 2.85 | 2.10E-25 |
| <i>TNFRSF19</i>  | -2.49 | 3.53 | 3.94E-17 |
| <i>CNR1</i>      | -2.59 | 3.17 | 3.70E-27 |
| <i>LOC728175</i> | -2.61 | 3.52 | 5.16E-30 |
| <i>LAMP5</i>     | -2.65 | 4.15 | 8.22E-14 |
| <i>EVC</i>       | -2.75 | 3.21 | 5.71E-29 |
| <i>DST</i>       | -3.04 | 6.75 | 6.90E-54 |
| <i>FBNI</i>      | -3.07 | 4.14 | 4.81E-63 |
| <i>KIF21A</i>    | -3.12 | 4.11 | 4.03E-47 |

**Table S5:** Significant differentially expressed genes (Fold change  $\geq 2$ ,  $\leq -2$ ) common to both cerebral palsy cases compared to in-house and gEUVADIS control data sets and cerebral palsy cases compared to in-house control samples regressed for age. Differential expression analysis was performed using the EdgeR package from Bioconductor.

| Cell line ID | Age at collection | Sex |
|--------------|-------------------|-----|
| 4611         | 19                | F   |
| 4669         | 22                | M   |
| 4673         | 26                | M   |
| 4701         | 26                | F   |
| 4706         | 25                | F   |
| 4750         | 21                | M   |
| 4768         | 23                | F   |
| 4910         | 21                | M   |
| 5004         | 20                | M   |
| 6931         | 25                | F   |

**Table S6: Control samples used for validation of gene expression changes.** Samples are from the ‘Aussie Normals’ collection (<https://www.neura.edu.au/scientific-facility/gra/biorepository-catalog/>)

| <i>Sample ID</i> | <i>Total number of outliers with cut-off of <math>\pm 4SDs</math></i> |
|------------------|-----------------------------------------------------------------------|
| <i>P058</i>      | <i>4</i>                                                              |
| <i>P409</i>      | <i>9</i>                                                              |
| <i>P425</i>      | <i>25</i>                                                             |
| <i>P459</i>      | <i>9</i>                                                              |
| <i>P463</i>      | <i>19</i>                                                             |
| <i>P467</i>      | <i>17</i>                                                             |
| <i>P469</i>      | <i>6</i>                                                              |
| <i>P470</i>      | <i>5</i>                                                              |
| <i>P429</i>      | <i>1</i>                                                              |

**Table S7:** Total number of outliers with cut-off of  $\pm 4SDs$  in samples where additional genetic variants were identified by correlation of gene expression changes with genetic data.

| <b>Modules from the CP unsigned network</b> | <b>Voineagu <i>et al.</i> combined network module</b> | <b>Enrichment p-value (corrected p-value)</b>                                                                                                                 | <b>Voineagu <i>et al.</i> annotation and cell type marker</b> |
|---------------------------------------------|-------------------------------------------------------|---------------------------------------------------------------------------------------------------------------------------------------------------------------|---------------------------------------------------------------|
| black                                       | M9_lightgreen                                         | $1.90 \times 10^{-23}$ ( $3.42 \times 10^{-22}$ )                                                                                                             | Ribosome                                                      |
| brown                                       | M16_tan                                               | $1.30 \times 10^{-5}$ ( $2.33 \times 10^{-4}$ )                                                                                                               | Astrocytes, activated microglia                               |
| cyan                                        | M17_turquoise                                         | $4.4 \times 10^{-2}$ (ns)                                                                                                                                     | Neurons                                                       |
| grey60                                      | ns                                                    | ns                                                                                                                                                            | Ns                                                            |
| lightyellow                                 | M16_tan                                               | $2.34 \times 10^{-4}$ ( $4.22 \times 10^{-3}$ )                                                                                                               | Astrocytes, activated microglia                               |
| magenta                                     | M3_brown                                              | $1.97 \times 10^{-3}$ ( $3.54 \times 10^{-2}$ )                                                                                                               | Ns                                                            |
| midnightblue                                | M2_blue                                               | $4.34 \times 10^{-34}$ ( $7.82 \times 10^{-33}$ )                                                                                                             | neurons                                                       |
| pink                                        | ns                                                    | ns                                                                                                                                                            | Ns                                                            |
| purple                                      | M6_greenyellow                                        | $7.27 \times 10^{-8}$ ( $1.31 \times 10^{-6}$ )                                                                                                               | Ns                                                            |
| red                                         | M17_turquoise                                         | $2.91 \times 10^{-3}$ (ns)                                                                                                                                    | neurons                                                       |
| turquoise                                   | M18_yellow                                            | $9.20 \times 10^{-14}$ ( $1.66 \times 10^{-12}$ )                                                                                                             | Synapse, glutamergic neurons                                  |
| white                                       | M16_tan                                               | $1.19 \times 10^{-2}$ (ns)                                                                                                                                    | Astrocytes, activated microglia                               |
| yellow                                      | M10_magenta, M13_purple, M16_tan                      | $2.50 \times 10^{-61}$ ( $4.50 \times 10^{-60}$ ),<br>$3.23 \times 10^{-27}$ ( $5.81 \times 10^{-26}$ ),<br>$3.60 \times 10^{-18}$ ( $6.48 \times 10^{-17}$ ) | Astrocytes, activated microglia                               |

**Table S8: Enrichment of our network modules for genes from autism cortex network modules.** The autism unsigned co-expression network was reconstructed with data from Voineagu *et al* 2011 with parameters for WGCNA as reported.

| Modules enriched for M16_tan module signal (Gupta <i>et al.</i> ) | Module from CP unsigned network | Corrected P-value for enrichment | Module eigengene significance - CP status | Annotation and cell type marker enrichment                  |
|-------------------------------------------------------------------|---------------------------------|----------------------------------|-------------------------------------------|-------------------------------------------------------------|
| <b>M5</b>                                                         | white                           | $8.19 \times 10^{-8}$            | $1.59 \times 10^{-9}$                     | <b>Microglia, BDNF signalling</b>                           |
|                                                                   | magenta                         | $8.96 \times 10^{-8}$            | $3.88 \times 10^{-4}$                     | Protein processing in ER                                    |
|                                                                   | brown                           | $9.00 \times 10^{-3}$            | ns                                        | Microglia, Astrocytes, Interferon alpha and beta signalling |
|                                                                   | lightyellow                     | $3.64 \times 10^{-2}$            | $3.31 \times 10^{-3}$                     | Protein processing in ER                                    |
| <b>M7</b>                                                         | turquoise                       | $2.91 \times 10^{-9}$            | ns                                        | Glu neurons, Glutamergic synaptic function                  |
|                                                                   | black                           | $2.27 \times 10^{-8}$            | ns                                        | Microglia, Eukaryotic elongation reactome                   |
|                                                                   | white                           | $4.64 \times 10^{-5}$            | $1.59 \times 10^{-9}$                     | Microglia, BDNF signalling                                  |
|                                                                   | brown                           | 0.001802                         | ns                                        | Microglia, Astrocytes, Interferon alpha and beta signalling |

**Table S9:** Enrichment of our network modules for genes from cortex modules enriched with signal from the M16\_tan network from the larger RNA sequencing study from Gupta *et al.* 2014. The M5 module was most enriched with genes from the white module from our network.



**A**

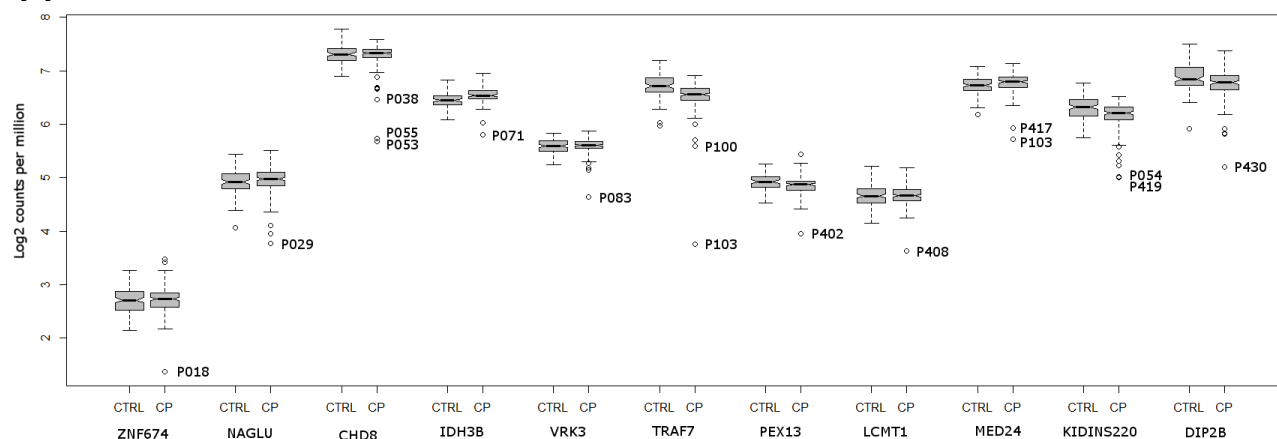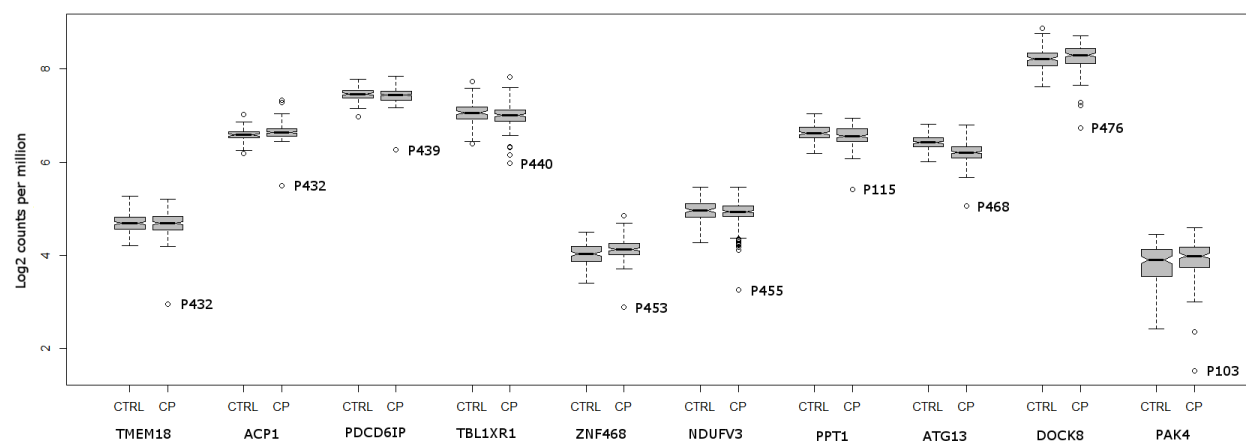

**B**

| Gene             | Case ID | Base pairs with >20x coverage (percent) | Median coverage per base pair | Mean coverage per base pair |
|------------------|---------|-----------------------------------------|-------------------------------|-----------------------------|
| <i>ACP1</i>      | P432    | 84.68%                                  | 38                            | 37.2                        |
| <i>ATG13</i>     | P468    | 94.78%                                  | 49                            | 53.2                        |
| <i>CHD8</i>      | P038    | 88.74%                                  | 67                            | 33.9                        |
| <i>CHD8</i>      | P053    | 88.91%                                  | 85                            | 92.8                        |
| <i>CHD8</i>      | P055    | 89.03%                                  | 75                            | 82.2                        |
| <i>DIP2B</i>     | P430    | 96.02%                                  | 44                            | 47.2                        |
| <i>DOCK8</i>     | P476    | 83.92%                                  | 57                            | 60.4                        |
| <i>IDH3B</i>     | P078    | 100.00%                                 | 86                            | 85.1                        |
| <i>KIDINS220</i> | P054    | 98.91%                                  | 87                            | 104.5                       |
| <i>KIDINS220</i> | P419    | 98.63%                                  | 73                            | 84.0                        |
| <i>LCMT1</i>     | P408    | 94.69%                                  | 53                            | 57.4                        |
| <i>MED24</i>     | P103    | 100.00%                                 | 68                            | 69.5                        |
| <i>MED24</i>     | P417    | 100.00%                                 | 61                            | 65.4                        |
| <i>NAGLU</i>     | P029    | 78.24%                                  | 41                            | 43.2                        |
| <i>NDUFV3</i>    | P455    | 88.50%                                  | 57                            | 54.9                        |
| <i>PAK4</i>      | P103    | 82.74%                                  | 47                            | 50.4                        |
| <i>PDCD61P</i>   | P439    | 95.73%                                  | 56                            | 28.5                        |
| <i>PEX13</i>     | P402    | 95.15%                                  | 53                            | 52.2                        |
| <i>PPT1</i>      | P115    | 100.00%                                 | 77                            | 85.6                        |
| <i>TBL1XR1</i>   | P440    | 100.00%                                 | 98                            | 98.6                        |
| <i>TMEM18</i>    | P432    | 57.94%                                  | 43                            | 35.0                        |
| <i>TRAF7</i>     | P100    | 98.08%                                  | 62                            | 67.2                        |
| <i>VRK3</i>      | P083    | 89.28%                                  | 60                            | 62.0                        |
| <i>ZNF468</i>    | P453    | 21.50%                                  | 14                            | 14.2                        |
| <i>ZNF674</i>    | P018    | 100.00%                                 | 110                           | 166.5                       |

**Figure S1: Outliers of interest with no detected genetic variant from WES to explain gene expression.** Samples had expression more than 4 standard deviations from the mean. **A)** Boxplots of log<sub>2</sub> counts per million for genes of interest. Samples with expression more than 4 standard deviations from the mean are listed. **B)** Whole exome sequencing coverage of genes of interest in outlier samples.

**A**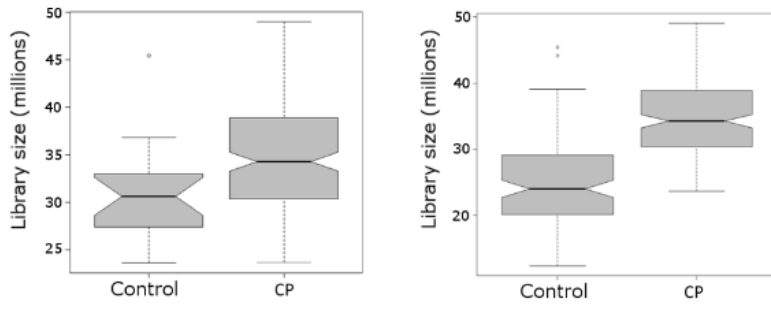**B**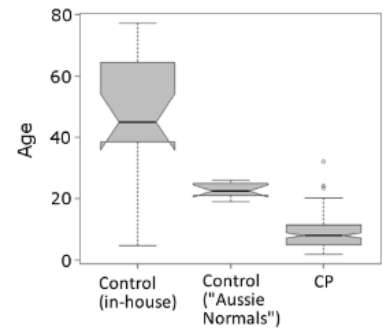**C**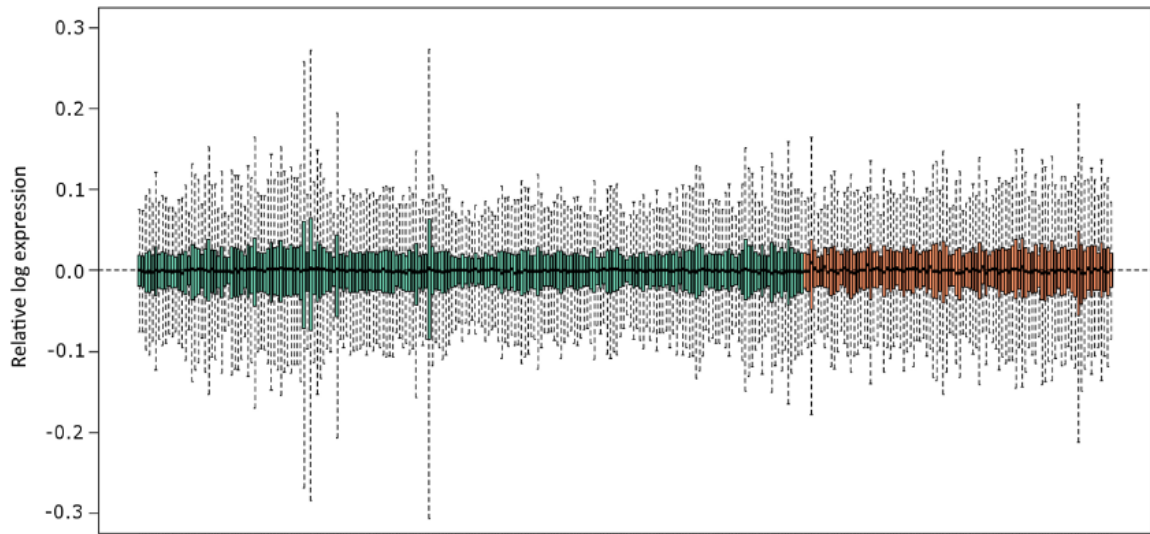**D**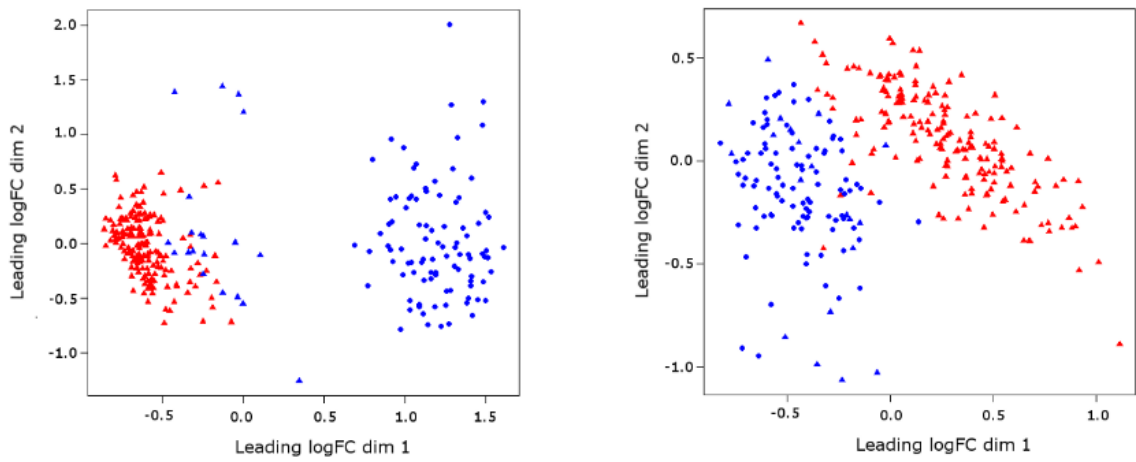

**Figure S2:** **A)** RNA sequencing library sizes. Left panel is samples sequenced as part of this study (all CP samples and 20 in-house controls). Right panel is all samples, including the 100 gEUVADIS data set controls. **B)** Age profile at time of sampling for samples from this study. In-house controls are the 20 control samples used in RNA sequencing, while the 'Aussie Normals' collection controls were used for quantitative RT PCR validation of select differentially expressed genes. **C)** Relative log expression of transcripts in each sample following data normalisation and batch correction using ComBat function from the SVA package in R. Green samples are those sequenced in this study, while orange samples are samples sequenced as part of the gEUVADIS data set. **D)** Multidimensional scaling plots for all samples before (left) and after (right) gender effects were blocked and batch effects removed using the ComBat function. CP cases are in red and controls are in blue, with triangles for samples sequenced in this study and circles for samples from the gEUVADIS data set.

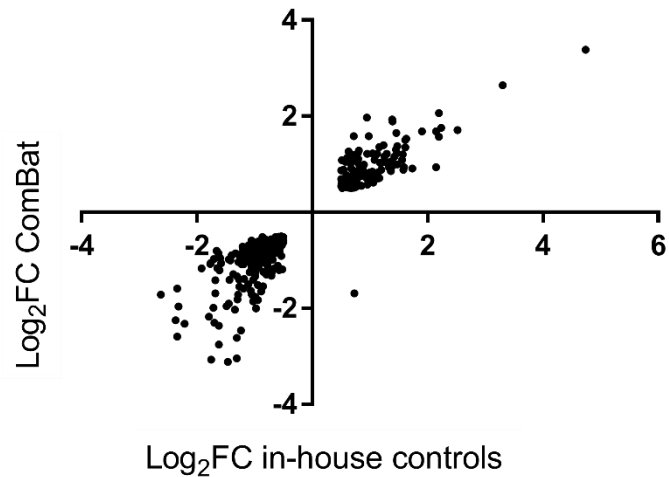

**Figure S3:** Concordance of  $\text{Log}_2\text{FC}$  for CP differentially expressed genes common to ComBat normalised data including samples from the gEUVADIS data set and data with in-house controls only. Only one gene of the 387 DE genes, *FAM169A*, showed discordance in direction of expression change.

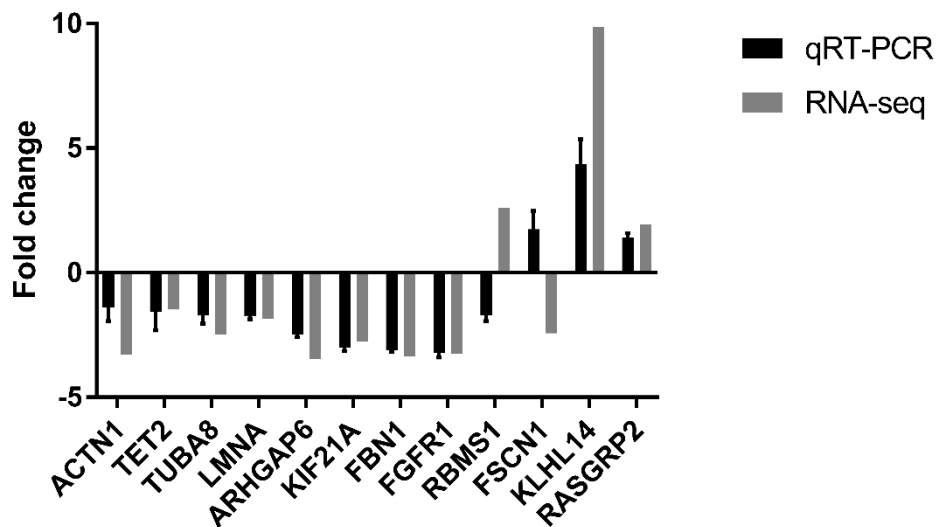

**Figure S4: Quantitative Real Time PCR validation of genes differentially expressed in CP cases compare to Controls.** Reverse transcription was performed on pooled RNA from 5 LCL samples, with a total of 2 control pools and 5 CP pools. Bar plots show fold change in CP cases compared to controls, with black bars showing fold change from qRT-PCR and grey bars showing fold change from RNA seq for CP cases compared to in-house controls.
